# Supplementary material
Source: publisher figshare collection journal article supplement (https://future-science-group.figshare.com/ndownloader/files/34788130)
Supplement: Supplementary file 1 [file 34788130]

**Supplementary Table 1. Search strategy**

| **ID** | **ID Search Terms** | **Results** |
| --- | --- | --- |
| **Medlin (Pubmed)** | | |
| **#1** | HHV-6 and Glioma | **22** |
| **#2** | HHV-6 and Glioblastom | 5 |
| **#3** | HHV-6 and brain tumor | 40 |
| **#4** | HHV-6 and brain cancer | 40 |
| **#5** | HHV-6 and primary brain tumor | 29 |
| **#6** | HHV-6 and primary brain cancer | 12 |
| **#7** | Human herpesvirus-6 and brain tumor | 35 |
| **Web of Science** | | |
| **#1** | HHV-6 and brain tumor | 28 |
| **#2** | Human herpesvirus-6 and brain tumor | 27 |
| **Scopus** | | |
| **#1** | HHV-6 and brain tumor | 34 |
| **#2** | Human herpesvirus-6 and brain tumor | 25 |
| **EMBASE** | | |
| **#1** | HHV-6 and brain tumor | 42 |
| **#2** | Human herpesvirus-6 and brain tumor | 39 |

**Supplementary Table 2. Quality assessment of included studies.**

| First Author | Q1 | Q2 | Q3 | Q4 | Q5 | Q6 | Q7 | Q8 | Q9 | Total QA score |
| --- | --- | --- | --- | --- | --- | --- | --- | --- | --- | --- |
| HHV-6 and Primary brain tumor | | | | | | | | | | |
| Cuomo et al. | Yes | yes | yes | yes | yes | yes | yes | yes | yes | 9 |
| Crawford et al. | yes | yes | yes | yes | yes | yes | yes | yes | yes | 9 |
| Crawford et al. | yes | yes | yes | yes | yes | yes | yes | yes | yes | 9 |
| Chi et al. | yes | yes | yes | yes | yes | yes | yes | yes | yes | 9 |
| Chi et al. | yes | yes | yes | yes | yes | yes | yes | yes | yes | 9 |
| Zheng et al. | yes | yes | yes | yes | yes | yes | yes | yes | yes | 9 |
| Lin et al. | yes | yes | yes | yes | yes | yes | yes | yes | yes | 9 |
| Crawford et al. | yes | yes | yes | yes | yes | yes | yes | yes | yes | 9 |
| Gu et al. | yes | yes | no | yes | yes | yes | yes | yes | yes | 8 |
| Crawford et al. | yes | yes | yes | yes | yes | yes | yes | yes | yes | 9 |
| Crawford et al. | yes | yes | yes | yes | yes | yes | yes | yes | yes | 9 |
| Crawford et al. | yes | yes | yes | yes | yes | yes | yes | yes | yes | 9 |
| Crawford et al. | yes | yes | yes | yes | yes | yes | yes | yes | yes | 9 |
| Crawford et al. | yes | yes | yes | yes | yes | yes | yes | yes | yes | 9 |
| Zheng et al. | yes | yes | yes | yes | yes | yes | yes | yes | yes | 9 |
| Zheng et al. | yes | yes | yes | yes | yes | yes | yes | yes | yes | 9 |
| Chi et al. | yes | yes | yes | yes | yes | yes | yes | yes | yes | 9 |
| Cantalupo et al. | yes | yes | yes | yes | yes | yes | yes | yes | yes | 9 |
| Cantalupo et al. | yes | yes | yes | yes | yes | yes | yes | yes | yes | 9 |
| Cao et al. | yes | yes | yes | yes | yes | yes | yes | yes | yes | 9 |
| Cao et al. | yes | yes | yes | yes | yes | yes | yes | yes | yes | 9 |
| Chan et al. | yes | yes | yes | yes | yes | yes | yes | yes | yes | 9 |
| Mayerava et al. | yes | yes | yes | yes | yes | yes | yes | yes | yes | 9 |
| Paulus et al. | yes | yes | yes | yes | yes | yes | yes | yes | yes | 9 |
| Strojnik et al. | yes | yes | yes | yes | yes | yes | yes | yes | yes | 9 |

*full text is not available. UN= Un Known, NA= not available

Q1= Was the sample frame appropriate to address the target population?

Q2= Were study participants sampled in an appropriate way?

Q3= Was the sample size adequate?

Q4= Were the study subjects and the setting described in detail?

Q5= Was the data analysis conducted with sufficient coverage of the identified sample?

Q6= Were valid methods used for the identification of the condition?

Q7= Was the condition measured in a standard, reliable way for all participants?

Q8= Was there appropriate statistical analysis?

Q9= Was the response rate adequate, and if not, was the low response rate managed appropriately?
